# Supplementary material
Source: PubMed Central journal article supplement (PMC2048705)
Supplement: plntcell_tpc.107.053777_1.pdf [file plntcell_tpc.107.053777_1.pdf]

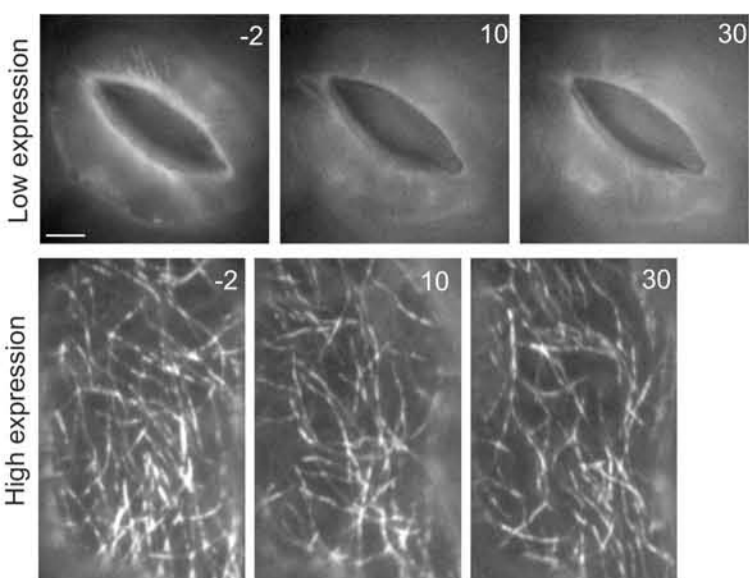

**Figure S1.** Overexpression of GFP-AtCLASP Induces Stable Microtubule Bundles. Top panels show treatment of low expressing cell with 20  $\mu\text{M}$  oryzalin. Bottom panels show treatment of high expressing cell with 40  $\mu\text{M}$  oryzalin. Times are in minutes. Bar, 5  $\mu\text{m}$ .

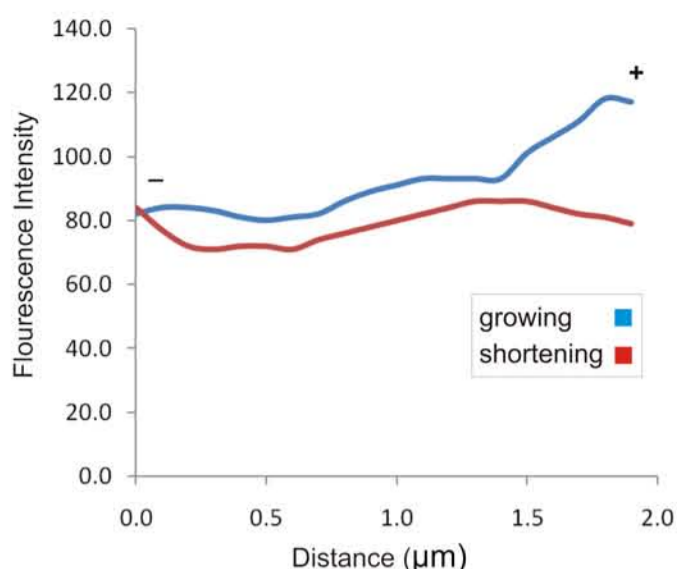

**Figure S2.** Fluorescence Intensity Plot of GFP-AtCLASP Along Growing and Shrinking Microtubules. Lines were drawn along the last two microns of the plus end. Profiles are shown for two representative microtubules.

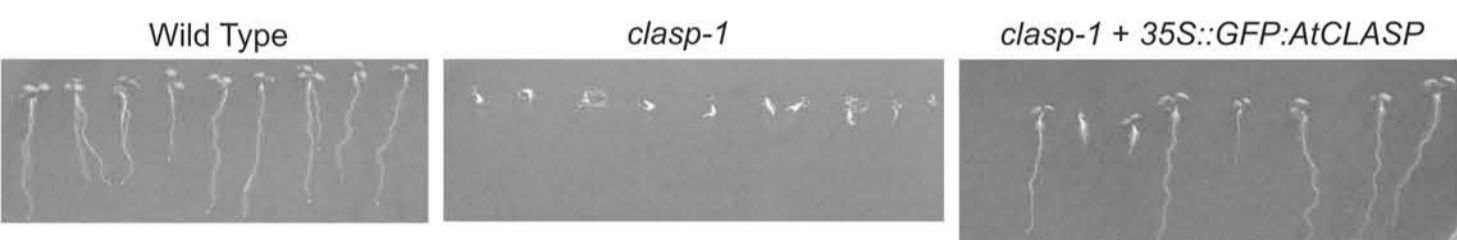

**Figure S3.** Molecular Complementation of *clasp-1* plants with 35S::GFP:AtCLASP. Plants were grown on agar plates and photographed at six days. The *clasp-1*/GFP:AtCLASP plants are segregating for the transgene.

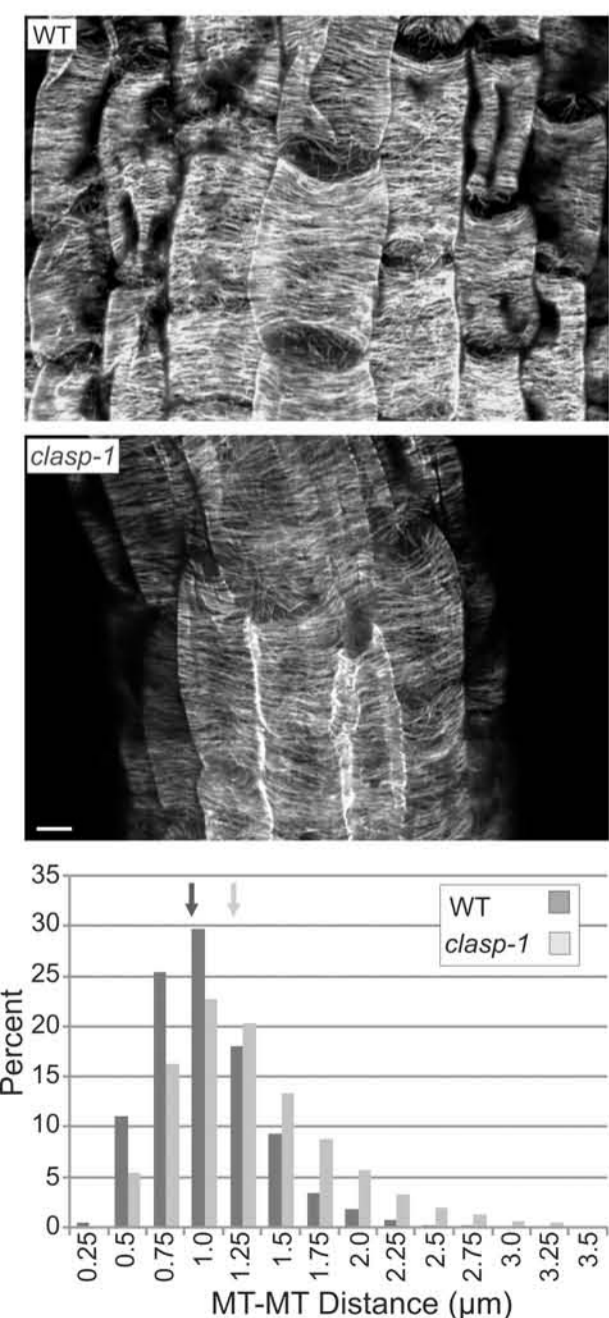

**Figure S4.** Root Cortical Microtubules are More Sparse in *clasp-1* Compared to Wild Type. Shown are late elongation zones. Arrows indicate means, which are significantly different (T-Test). Bar, 10  $\mu\text{m}$ .

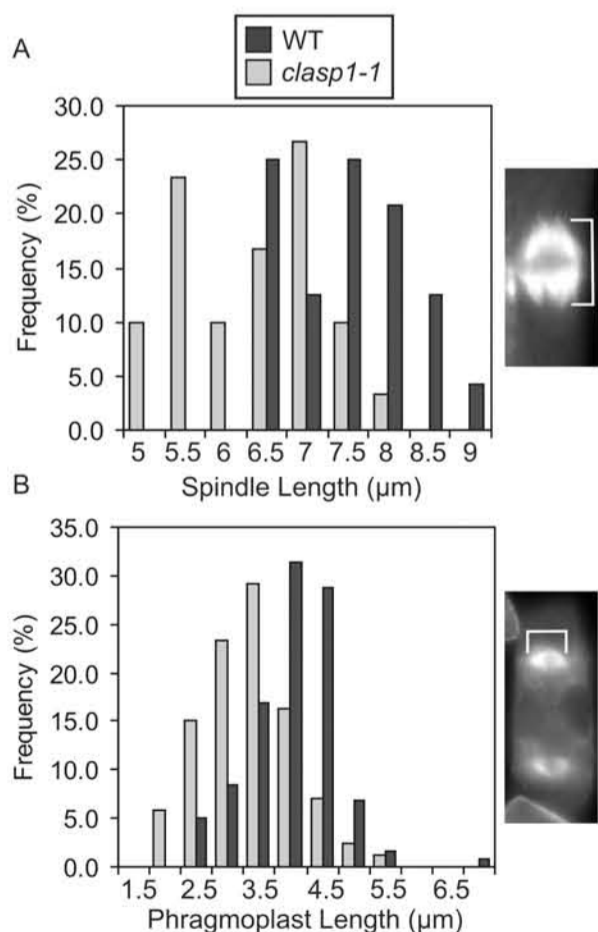

**Figure S5. Spindle and Phragmoplast Lengths are Reduced in *clasp-1*.** Measurements were taken from anti-tubulin immunofluorescence staining in root squashes of 7-day plants. (A) Histogram of wild-type and *clasp-1* spindle lengths. (B) Histogram of wild type and *clasp-1* phragmoplast lengths. Brackets in images denote length.
